# Supplementary material
Source: PubMed Central journal article supplement (PMC4538709)

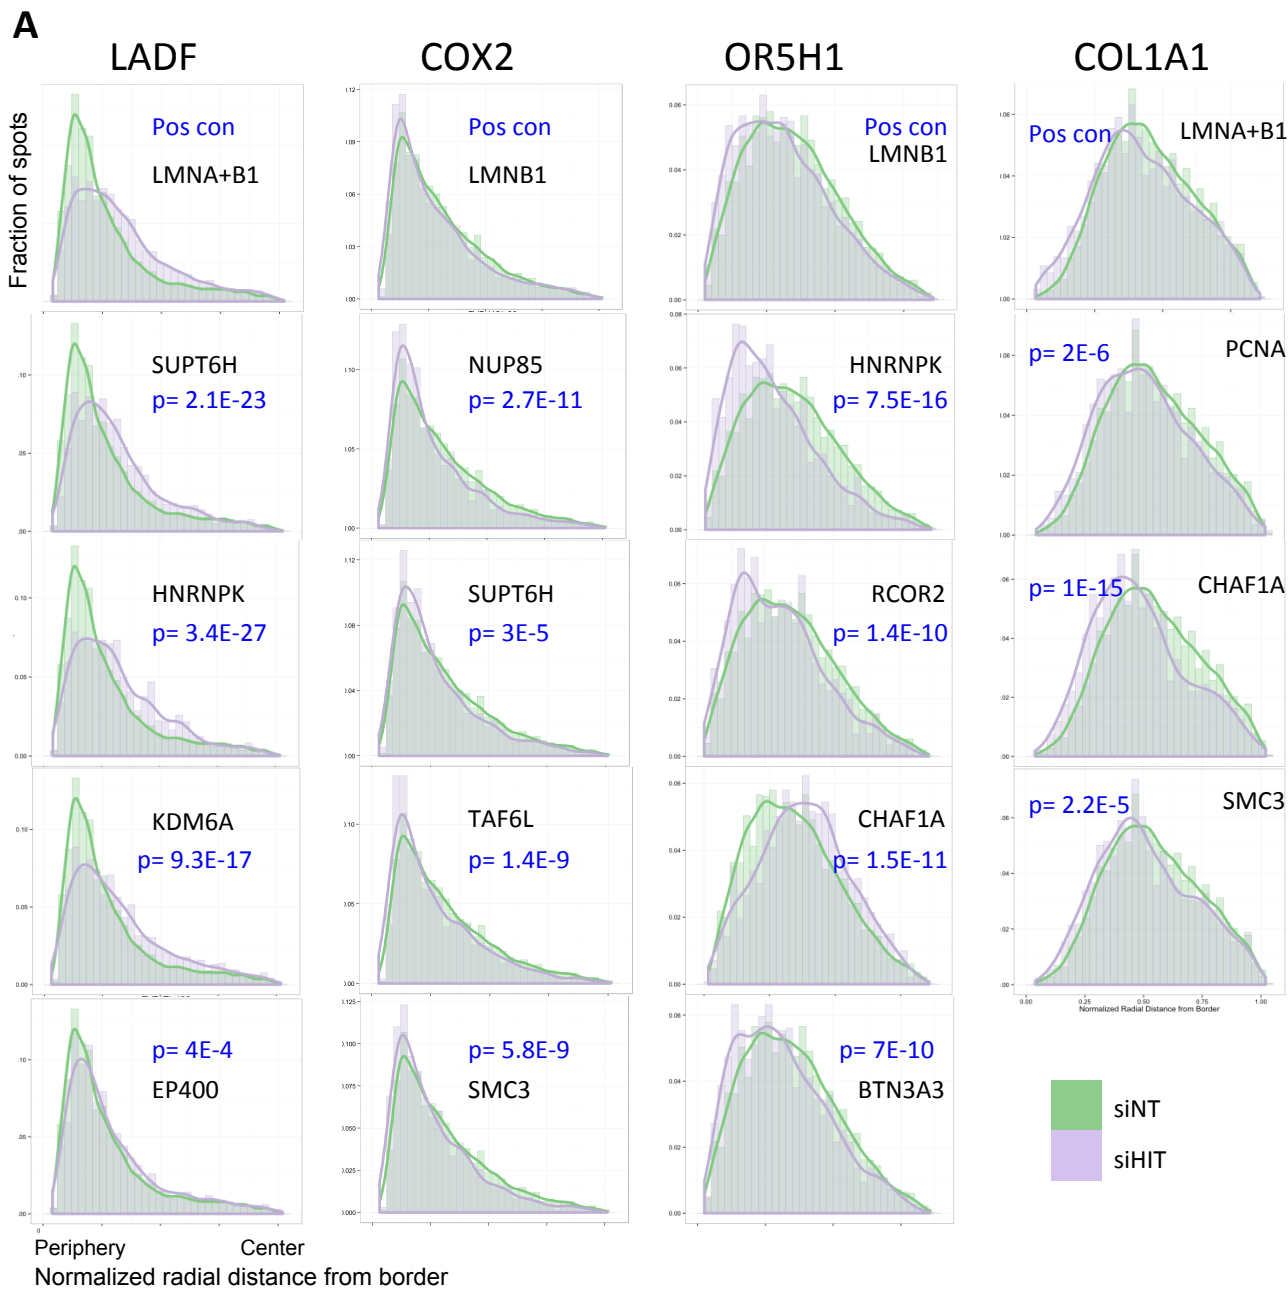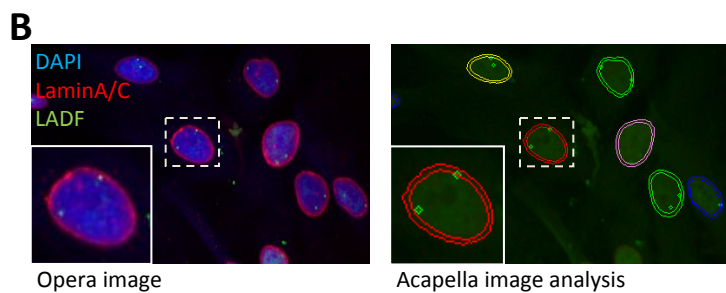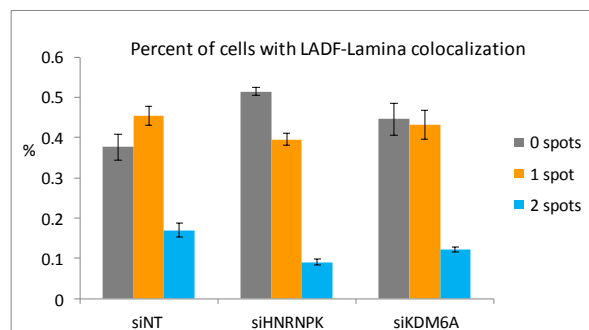

Supplement: NIHMS710424-supplement-3.pdf [file NIHMS710424-supplement-3.pdf]
